# Supplementary material
Source: publisher figshare collection journal article supplement (https://sage.figshare.com/ndownloader/files/32394675)
Supplement: Supplementary file 1 [file 32394675]

CFA\_FM.amw


#### D:\FACULTY\RESEARCH\COVID 19\DATA\CFA\_FM.amw

##### Analysis Summary

##### Date and Time

Date: Thursday, October 22, 2020

Time: 4:31:37 PM

##### Title

Cfa\_fm: Thursday, October 22, 2020 4:31 PM

##### Groups

##### Group number 1 (Group number 1)

##### Notes for Group (Group number 1)

The model is recursive.

Sample size = 323

##### Variable Summary (Group number 1)

##### Your model contains the following variables (Group number 1)

Observed, endogenous variables

DN\_FM1

DN\_FM2

DN\_FM3

RE\_FM1

RE\_FM2

RE\_FM3

RE\_FM4

SE\_FM1

SE\_FM2

SE\_FM3

SE\_FM4

IN\_FM1

BI\_FM1

BI\_FM2

BI\_FM3

Severity4

Severity3

Severity2

Severity1

Susceptib4

Susceptib3

Susceptib2

Susceptib1

IN\_FM2

SE\_FM5

DN\_FM4

IN\_FM4

BEHAVIOR\_FM\_4

BEHAVIOR\_FM\_3

BEHAVIOR\_FM\_2

BEHAVIOR\_FM\_1

SE\_FM6R

Unobserved, endogenous variables

RES\_FM

SEF\_FM

SEV

SUS

Unobserved, exogenous variables

DES\_FM

e2

e3

e4

e5

e6

e7

e8

e10

e11

e12

e13

EFF\_CLEAN

e14

e15

INJ\_FM

e18

INTENT\_FM

e19

e20

e21

e32

e33

e34

e35

e36

e37

e38

e39

e40

e41

RI\_FM

e43

e44

e45

e47

BE\_FM

e50

e51

e52

e53

e54

##### Variable counts (Group number 1)

|  |  |
| --- | --- |
| Number of variables in your model: | 78 |
| Number of observed variables: | 32 |
| Number of unobserved variables: | 46 |
| Number of exogenous variables: | 42 |
| Number of endogenous variables: | 36 |

##### Parameter Summary (Group number 1)

|  | Weights | Covariances | Variances | Means | Intercepts | Total |
| --- | --- | --- | --- | --- | --- | --- |
| Fixed | 46 | 0 | 0 | 0 | 0 | 46 |
| Labeled | 0 | 0 | 0 | 0 | 0 | 0 |
| Unlabeled | 26 | 15 | 42 | 0 | 0 | 83 |
| Total | 72 | 15 | 42 | 0 | 0 | 129 |

##### Models

##### Default model (Default model)

##### Notes for Model (Default model)

##### Computation of degrees of freedom (Default model)

|  |  |
| --- | --- |
| Number of distinct sample moments: | 528 |
| Number of distinct parameters to be estimated: | 83 |
| Degrees of freedom (528 - 83): | 445 |

##### Result (Default model)

Minimum was achieved

Chi-square = 1129.327

Degrees of freedom = 445

Probability level = .000

##### Group number 1 (Group number 1 - Default model)

##### Estimates (Group number 1 - Default model)

##### Scalar Estimates (Group number 1 - Default model)

##### Maximum Likelihood Estimates

##### Regression Weights: (Group number 1 - Default model)

|  |  |  | Estimate | S.E. | C.R. | P | Label |
| --- | --- | --- | --- | --- | --- | --- | --- |
| RES\_FM | <--- | EFF\_CLEAN | .993 | .081 | 12.316 | \*\*\* |  |
| SEF\_FM | <--- | EFF\_CLEAN | 1.000 |  |
| SEV | <--- | RI\_FM | 1.000 |  |
| SUS | <--- | RI\_FM | .329 | .086 | 3.834 | \*\*\* |  |
| DN\_FM1 | <--- | DES\_FM | 1.077 | .052 | 20.541 | \*\*\* |  |
| DN\_FM2 | <--- | DES\_FM | 1.053 | .053 | 19.895 | \*\*\* |  |
| DN\_FM3 | <--- | DES\_FM | 1.000 |  |
| RE\_FM1 | <--- | RES\_FM | 1.000 |  |
| RE\_FM2 | <--- | RES\_FM | 1.055 | .082 | 12.820 | \*\*\* |  |
| RE\_FM3 | <--- | RES\_FM | 1.029 | .073 | 14.009 | \*\*\* |  |
| RE\_FM4 | <--- | RES\_FM | .918 | .069 | 13.393 | \*\*\* |  |
| SE\_FM1 | <--- | SEF\_FM | 1.000 |  |
| SE\_FM2 | <--- | SEF\_FM | 1.070 | .051 | 20.910 | \*\*\* |  |
| SE\_FM3 | <--- | SEF\_FM | .991 | .072 | 13.689 | \*\*\* |  |
| SE\_FM4 | <--- | SEF\_FM | 1.020 | .051 | 20.155 | \*\*\* |  |
| IN\_FM1 | <--- | INJ\_FM | .945 | .058 | 16.249 | \*\*\* |  |
| BI\_FM1 | <--- | INTENT\_FM | 1.000 |  |
| BI\_FM2 | <--- | INTENT\_FM | .968 | .028 | 34.408 | \*\*\* |  |
| BI\_FM3 | <--- | INTENT\_FM | .924 | .030 | 30.434 | \*\*\* |  |
| Severity4 | <--- | SEV | 1.000 |  |
| Severity3 | <--- | SEV | .563 | .056 | 9.987 | \*\*\* |  |
| Severity2 | <--- | SEV | .617 | .059 | 10.530 | \*\*\* |  |
| Severity1 | <--- | SEV | .922 | .076 | 12.063 | \*\*\* |  |
| Susceptib4 | <--- | SUS | 1.000 |  |
| Susceptib3 | <--- | SUS | 1.059 | .074 | 14.309 | \*\*\* |  |
| Susceptib2 | <--- | SUS | .809 | .068 | 11.825 | \*\*\* |  |
| Susceptib1 | <--- | SUS | 1.060 | .076 | 14.029 | \*\*\* |  |
| IN\_FM2 | <--- | INJ\_FM | 1.000 |  |
| SE\_FM5 | <--- | SEF\_FM | .803 | .048 | 16.648 | \*\*\* |  |
| DN\_FM4 | <--- | DES\_FM | 1.104 | .048 | 22.995 | \*\*\* |  |
| IN\_FM4 | <--- | INJ\_FM | .807 | .079 | 10.173 | \*\*\* |  |
| BEHAVIOR\_FM\_4 | <--- | BE\_FM | .919 | .046 | 19.957 | \*\*\* |  |
| BEHAVIOR\_FM\_3 | <--- | BE\_FM | .972 | .065 | 14.962 | \*\*\* |  |
| BEHAVIOR\_FM\_2 | <--- | BE\_FM | .947 | .033 | 28.301 | \*\*\* |  |
| BEHAVIOR\_FM\_1 | <--- | BE\_FM | 1.000 |  |
| SE\_FM6R | <--- | SEF\_FM | .601 | .090 | 6.682 | \*\*\* |  |

##### Standardized Regression Weights: (Group number 1 - Default model)

|  |  |  | Estimate |
| --- | --- | --- | --- |
| RES\_FM | <--- | EFF\_CLEAN | .899 |
| SEF\_FM | <--- | EFF\_CLEAN | .934 |
| SEV | <--- | RI\_FM | 1.281 |
| SUS | <--- | RI\_FM | .433 |
| DN\_FM1 | <--- | DES\_FM | .860 |
| DN\_FM2 | <--- | DES\_FM | .845 |
| DN\_FM3 | <--- | DES\_FM | .858 |
| RE\_FM1 | <--- | RES\_FM | .684 |
| RE\_FM2 | <--- | RES\_FM | .787 |
| RE\_FM3 | <--- | RES\_FM | .873 |
| RE\_FM4 | <--- | RES\_FM | .827 |
| SE\_FM1 | <--- | SEF\_FM | .869 |
| SE\_FM2 | <--- | SEF\_FM | .865 |
| SE\_FM3 | <--- | SEF\_FM | .665 |
| SE\_FM4 | <--- | SEF\_FM | .848 |
| IN\_FM1 | <--- | INJ\_FM | .763 |
| BI\_FM1 | <--- | INTENT\_FM | .943 |
| BI\_FM2 | <--- | INTENT\_FM | .944 |
| BI\_FM3 | <--- | INTENT\_FM | .913 |
| Severity4 | <--- | SEV | .770 |
| Severity3 | <--- | SEV | .600 |
| Severity2 | <--- | SEV | .632 |
| Severity1 | <--- | SEV | .727 |
| Susceptib4 | <--- | SUS | .795 |
| Susceptib3 | <--- | SUS | .799 |
| Susceptib2 | <--- | SUS | .667 |
| Susceptib1 | <--- | SUS | .782 |
| IN\_FM2 | <--- | INJ\_FM | .822 |
| SE\_FM5 | <--- | SEF\_FM | .758 |
| DN\_FM4 | <--- | DES\_FM | .912 |
| IN\_FM4 | <--- | INJ\_FM | .528 |
| BEHAVIOR\_FM\_4 | <--- | BE\_FM | .793 |
| BEHAVIOR\_FM\_3 | <--- | BE\_FM | .676 |
| BEHAVIOR\_FM\_2 | <--- | BE\_FM | .920 |
| BEHAVIOR\_FM\_1 | <--- | BE\_FM | .939 |
| SE\_FM6R | <--- | SEF\_FM | .367 |

##### Covariances: (Group number 1 - Default model)

|  |  |  | Estimate | S.E. | C.R. | P | Label |
| --- | --- | --- | --- | --- | --- | --- | --- |
| DES\_FM | <--> | EFF\_CLEAN | 1.153 | .122 | 9.455 | \*\*\* |  |
| DES\_FM | <--> | INTENT\_FM | 1.416 | .144 | 9.861 | \*\*\* |  |
| EFF\_CLEAN | <--> | INTENT\_FM | 1.608 | .151 | 10.618 | \*\*\* |  |
| EFF\_CLEAN | <--> | INJ\_FM | 1.170 | .122 | 9.582 | \*\*\* |  |
| INJ\_FM | <--> | INTENT\_FM | 1.480 | .145 | 10.179 | \*\*\* |  |
| DES\_FM | <--> | INJ\_FM | 1.441 | .136 | 10.590 | \*\*\* |  |
| EFF\_CLEAN | <--> | RI\_FM | 1.055 | .134 | 7.860 | \*\*\* |  |
| INTENT\_FM | <--> | RI\_FM | 1.161 | .155 | 7.518 | \*\*\* |  |
| INJ\_FM | <--> | RI\_FM | .891 | .129 | 6.910 | \*\*\* |  |
| DES\_FM | <--> | RI\_FM | .838 | .127 | 6.621 | \*\*\* |  |
| DES\_FM | <--> | BE\_FM | .952 | .103 | 9.247 | \*\*\* |  |
| INJ\_FM | <--> | BE\_FM | .842 | .099 | 8.544 | \*\*\* |  |
| EFF\_CLEAN | <--> | BE\_FM | .788 | .095 | 8.267 | \*\*\* |  |
| INTENT\_FM | <--> | BE\_FM | 1.136 | .119 | 9.552 | \*\*\* |  |
| RI\_FM | <--> | BE\_FM | .593 | .106 | 5.613 | \*\*\* |  |

##### Correlations: (Group number 1 - Default model)

|  |  |  | Estimate |
| --- | --- | --- | --- |
| DES\_FM | <--> | EFF\_CLEAN | .802 |
| DES\_FM | <--> | INTENT\_FM | .765 |
| EFF\_CLEAN | <--> | INTENT\_FM | .928 |
| EFF\_CLEAN | <--> | INJ\_FM | .871 |
| INJ\_FM | <--> | INTENT\_FM | .856 |
| DES\_FM | <--> | INJ\_FM | 1.005 |
| EFF\_CLEAN | <--> | RI\_FM | .523 |
| INTENT\_FM | <--> | RI\_FM | .447 |
| INJ\_FM | <--> | RI\_FM | .443 |
| DES\_FM | <--> | RI\_FM | .389 |
| DES\_FM | <--> | BE\_FM | .695 |
| INJ\_FM | <--> | BE\_FM | .658 |
| EFF\_CLEAN | <--> | BE\_FM | .614 |
| INTENT\_FM | <--> | BE\_FM | .688 |
| RI\_FM | <--> | BE\_FM | .308 |

##### Variances: (Group number 1 - Default model)

|  |  |  | Estimate | S.E. | C.R. | P | Label |
| --- | --- | --- | --- | --- | --- | --- | --- |
| DES\_FM |  |  | 1.535 | .161 | 9.547 | \*\*\* |  |
| EFF\_CLEAN |  |  | 1.346 | .154 | 8.729 | \*\*\* |  |
| INJ\_FM |  |  | 1.340 | .153 | 8.778 | \*\*\* |  |
| INTENT\_FM |  |  | 2.231 | .198 | 11.276 | \*\*\* |  |
| RI\_FM |  |  | 3.025 | .715 | 4.232 | \*\*\* |  |
| BE\_FM |  |  | 1.223 | .111 | 11.035 | \*\*\* |  |
| e14 |  |  | .317 | .065 | 4.871 | \*\*\* |  |
| e15 |  |  | .197 | .044 | 4.460 | \*\*\* |  |
| e40 |  |  | -1.181 | .653 | -1.810 | .070 |  |
| e41 |  |  | 1.419 | .193 | 7.342 | \*\*\* |  |
| e2 |  |  | .625 | .058 | 10.721 | \*\*\* |  |
| e3 |  |  | .680 | .062 | 10.965 | \*\*\* |  |
| e4 |  |  | .550 | .051 | 10.760 | \*\*\* |  |
| e5 |  |  | 1.868 | .161 | 11.633 | \*\*\* |  |
| e6 |  |  | 1.128 | .105 | 10.715 | \*\*\* |  |
| e7 |  |  | .543 | .062 | 8.730 | \*\*\* |  |
| e8 |  |  | .641 | .064 | 10.036 | \*\*\* |  |
| e10 |  |  | .499 | .050 | 9.949 | \*\*\* |  |
| e11 |  |  | .594 | .059 | 10.055 | \*\*\* |  |
| e12 |  |  | 1.913 | .159 | 12.000 | \*\*\* |  |
| e13 |  |  | .627 | .060 | 10.426 | \*\*\* |  |
| e18 |  |  | .861 | .076 | 11.333 | \*\*\* |  |
| e19 |  |  | .276 | .033 | 8.445 | \*\*\* |  |
| e20 |  |  | .256 | .030 | 8.414 | \*\*\* |  |
| e21 |  |  | .379 | .037 | 10.103 | \*\*\* |  |
| e32 |  |  | 1.267 | .143 | 8.881 | \*\*\* |  |
| e33 |  |  | 1.041 | .093 | 11.250 | \*\*\* |  |
| e34 |  |  | 1.056 | .096 | 10.979 | \*\*\* |  |
| e35 |  |  | 1.395 | .143 | 9.756 | \*\*\* |  |
| e36 |  |  | 1.017 | .113 | 8.996 | \*\*\* |  |
| e37 |  |  | 1.109 | .125 | 8.892 | \*\*\* |  |
| e38 |  |  | 1.422 | .129 | 11.002 | \*\*\* |  |
| e39 |  |  | 1.246 | .134 | 9.304 | \*\*\* |  |
| e43 |  |  | .644 | .063 | 10.164 | \*\*\* |  |
| e44 |  |  | .735 | .064 | 11.507 | \*\*\* |  |
| e45 |  |  | .377 | .041 | 9.206 | \*\*\* |  |
| e47 |  |  | 2.251 | .180 | 12.519 | \*\*\* |  |
| e50 |  |  | .610 | .054 | 11.344 | \*\*\* |  |
| e51 |  |  | 1.370 | .114 | 12.033 | \*\*\* |  |
| e52 |  |  | .200 | .026 | 7.783 | \*\*\* |  |
| e53 |  |  | .165 | .026 | 6.396 | \*\*\* |  |
| e54 |  |  | 3.568 | .284 | 12.554 | \*\*\* |  |

##### Matrices (Group number 1 - Default model)

##### Residual Covariances (Group number 1 - Default model)

|  | SE\_FM6R | BEHAVIOR\_FM\_1 | BEHAVIOR\_FM\_2 | BEHAVIOR\_FM\_3 | BEHAVIOR\_FM\_4 | IN\_FM4 | DN\_FM4 | SE\_FM5 | IN\_FM2 | Susceptib1 | Susceptib2 | Susceptib3 | Susceptib4 | Severity1 | Severity2 | Severity3 | Severity4 | BI\_FM3 | BI\_FM2 | BI\_FM1 | IN\_FM1 | SE\_FM4 | SE\_FM3 | SE\_FM2 | SE\_FM1 | RE\_FM4 | RE\_FM3 | RE\_FM2 | RE\_FM1 | DN\_FM3 | DN\_FM2 | DN\_FM1 |
| --- | --- | --- | --- | --- | --- | --- | --- | --- | --- | --- | --- | --- | --- | --- | --- | --- | --- | --- | --- | --- | --- | --- | --- | --- | --- | --- | --- | --- | --- | --- | --- | --- |
| SE\_FM6R | .000 |
| BEHAVIOR\_FM\_1 | .115 | .000 |
| BEHAVIOR\_FM\_2 | -.066 | .009 | .000 |
| BEHAVIOR\_FM\_3 | .187 | -.022 | -.024 | .000 |
| BEHAVIOR\_FM\_4 | .051 | -.005 | -.020 | .084 | .000 |
| IN\_FM4 | -.561 | -.034 | -.035 | .107 | .261 | .000 |
| DN\_FM4 | -.092 | .014 | -.017 | .075 | .119 | .040 | .000 |
| SE\_FM5 | -.050 | .029 | .027 | .199 | .074 | -.009 | .029 | .000 |
| IN\_FM2 | -.196 | -.078 | -.056 | -.015 | .016 | -.042 | .019 | -.012 | .000 |
| Susceptib1 | -.359 | -.144 | -.006 | .039 | .003 | .319 | .016 | -.009 | .029 | .000 |
| Susceptib2 | -.191 | -.168 | -.065 | -.161 | -.180 | -.036 | -.135 | .027 | -.005 | .015 | .000 |
| Susceptib3 | -.220 | -.053 | .084 | .186 | .063 | .184 | -.070 | .077 | -.024 | -.147 | .104 | .000 |
| Susceptib4 | -.335 | -.071 | -.061 | .107 | .054 | .274 | -.014 | -.049 | .033 | .047 | -.103 | .079 | .000 |
| Severity1 | -.434 | -.064 | -.068 | -.044 | .066 | .297 | -.118 | -.060 | .000 | .246 | -.095 | -.043 | -.187 | .000 |
| Severity2 | -.047 | .079 | -.003 | .200 | .162 | .153 | .147 | .224 | .065 | -.267 | -.208 | -.250 | -.327 | -.058 | .000 |
| Severity3 | -.101 | -.022 | .055 | .117 | .051 | .231 | .069 | .314 | .039 | -.001 | .113 | .024 | -.229 | -.201 | .305 | .000 |
| Severity4 | -.537 | -.109 | -.027 | .067 | .166 | .256 | -.132 | -.081 | -.127 | .622 | .049 | .119 | .156 | .312 | -.182 | -.190 | .000 |
| BI\_FM3 | .066 | -.036 | -.072 | .106 | .021 | .178 | .057 | .094 | -.093 | .034 | -.061 | .028 | .091 | -.127 | .110 | .123 | -.130 | .000 |
| BI\_FM2 | -.068 | -.001 | -.025 | .151 | .067 | .105 | -.014 | .029 | -.121 | .111 | -.055 | .034 | .117 | -.122 | .170 | .173 | -.105 | -.015 | .000 |
| BI\_FM1 | -.001 | -.036 | .001 | .293 | .145 | .194 | -.017 | .018 | -.142 | .133 | -.052 | .083 | .122 | -.076 | .117 | .135 | -.048 | -.018 | .022 | .000 |
| IN\_FM1 | .010 | .076 | .015 | .145 | .239 | .152 | -.019 | .117 | -.021 | -.104 | -.303 | -.105 | .038 | -.228 | .234 | .044 | -.198 | .137 | .125 | .108 | .000 |
| SE\_FM4 | .078 | .028 | -.035 | .184 | .134 | .058 | -.009 | -.036 | -.051 | -.151 | -.211 | -.225 | -.200 | -.346 | .060 | .087 | -.373 | .140 | .064 | -.006 | .071 | .000 |
| SE\_FM3 | .327 | -.064 | -.129 | -.035 | -.051 | -.104 | -.076 | .012 | -.066 | .253 | .257 | .288 | .244 | -.007 | .237 | .205 | .068 | .022 | -.059 | -.070 | -.018 | .001 | .000 |
| SE\_FM2 | .013 | .015 | .050 | .195 | .160 | .123 | .116 | -.100 | -.035 | -.025 | -.041 | -.071 | -.004 | -.269 | .118 | .235 | -.320 | .126 | -.023 | .007 | .025 | .023 | -.080 | .000 |
| SE\_FM1 | -.047 | -.040 | -.116 | .058 | .112 | .072 | -.046 | -.015 | -.078 | -.054 | -.090 | -.127 | -.075 | -.125 | .114 | .194 | -.293 | .109 | -.067 | -.039 | .071 | .019 | -.006 | .057 | .000 |
| RE\_FM4 | .124 | .153 | .110 | .378 | .203 | .114 | .110 | .330 | -.003 | .185 | -.001 | .149 | .163 | .045 | .340 | .299 | .102 | .149 | .113 | .120 | .316 | -.042 | .193 | .055 | .070 | .000 |
| RE\_FM3 | .041 | -.109 | -.137 | .084 | .071 | .089 | -.049 | .241 | -.145 | -.098 | -.140 | -.038 | -.053 | -.113 | .294 | .148 | -.062 | .032 | -.086 | -.073 | .129 | -.034 | .067 | -.004 | -.069 | -.074 | .000 |
| RE\_FM2 | -.074 | -.055 | -.164 | .254 | .078 | .190 | .018 | .157 | -.240 | .185 | .120 | .201 | .230 | -.080 | .302 | .055 | -.092 | -.033 | -.130 | -.151 | .077 | -.179 | -.153 | -.086 | -.202 | -.071 | .088 | .000 |
| RE\_FM1 | -.125 | -.090 | -.187 | .096 | -.099 | -.051 | -.107 | .132 | -.222 | .400 | .403 | .351 | .357 | .014 | .437 | .147 | .158 | -.193 | -.211 | -.224 | -.045 | -.269 | .950 | -.182 | -.306 | -.057 | .063 | .240 | .000 |
| DN\_FM3 | .032 | .119 | .095 | .234 | .138 | -.049 | .039 | .129 | -.053 | -.014 | -.163 | -.057 | -.084 | -.122 | .093 | .082 | -.137 | .182 | .122 | .115 | .024 | .142 | -.047 | .093 | .012 | .207 | .064 | -.009 | -.186 | .000 |
| DN\_FM2 | -.082 | -.118 | -.078 | -.106 | .014 | -.243 | -.056 | .019 | .125 | .137 | -.082 | .008 | -.026 | -.031 | .136 | .147 | -.096 | -.057 | -.057 | -.079 | -.060 | .023 | .030 | .040 | .009 | .019 | -.050 | -.160 | -.236 | -.063 | .000 |
| DN\_FM1 | -.204 | -.110 | -.063 | -.063 | .003 | -.125 | -.020 | -.039 | .099 | .100 | -.143 | .091 | .056 | .006 | .109 | .103 | -.012 | -.082 | -.077 | -.101 | -.096 | -.089 | -.103 | -.058 | -.167 | .025 | .017 | -.195 | -.155 | -.063 | .195 | .000 |

##### Standardized Residual Covariances (Group number 1 - Default model)

|  | SE\_FM6R | BEHAVIOR\_FM\_1 | BEHAVIOR\_FM\_2 | BEHAVIOR\_FM\_3 | BEHAVIOR\_FM\_4 | IN\_FM4 | DN\_FM4 | SE\_FM5 | IN\_FM2 | Susceptib1 | Susceptib2 | Susceptib3 | Susceptib4 | Severity1 | Severity2 | Severity3 | Severity4 | BI\_FM3 | BI\_FM2 | BI\_FM1 | IN\_FM1 | SE\_FM4 | SE\_FM3 | SE\_FM2 | SE\_FM1 | RE\_FM4 | RE\_FM3 | RE\_FM2 | RE\_FM1 | DN\_FM3 | DN\_FM2 | DN\_FM1 |
| --- | --- | --- | --- | --- | --- | --- | --- | --- | --- | --- | --- | --- | --- | --- | --- | --- | --- | --- | --- | --- | --- | --- | --- | --- | --- | --- | --- | --- | --- | --- | --- | --- |
| SE\_FM6R | .000 |
| BEHAVIOR\_FM\_1 | .843 | .000 |
| BEHAVIOR\_FM\_2 | -.505 | .095 | .000 |
| BEHAVIOR\_FM\_3 | 1.029 | -.177 | -.198 | .000 |
| BEHAVIOR\_FM\_4 | .347 | -.047 | -.195 | .653 | .000 |
| IN\_FM4 | -2.768 | -.277 | -.296 | .665 | 1.995 | .000 |
| DN\_FM4 | -.527 | .119 | -.156 | .521 | .989 | .245 | .000 |
| SE\_FM5 | -.327 | .309 | .297 | 1.639 | .749 | -.066 | .238 | .000 |
| IN\_FM2 | -1.196 | -.754 | -.557 | -.114 | .149 | -.275 | .127 | -.103 | .000 |
| Susceptib1 | -1.767 | -1.222 | -.056 | .244 | .026 | 1.802 | .106 | -.068 | .208 | .000 |
| Susceptib2 | -1.051 | -1.589 | -.639 | -1.132 | -1.572 | -.226 | -1.002 | .231 | -.042 | .085 | .000 |
| Susceptib3 | -1.106 | -.461 | .748 | 1.194 | .499 | 1.066 | -.472 | .598 | -.177 | -.715 | .588 | .000 |
| Susceptib4 | -1.775 | -.647 | -.572 | .723 | .450 | 1.671 | -.101 | -.396 | .254 | .240 | -.615 | .412 | .000 |
| Severity1 | -2.200 | -.544 | -.604 | -.286 | .521 | 1.713 | -.779 | -.449 | .000 | 1.366 | -.600 | -.246 | -1.117 | .000 |
| Severity2 | -.310 | .879 | -.033 | 1.683 | 1.673 | 1.149 | 1.275 | 2.211 | .599 | -1.945 | -1.713 | -1.861 | -2.568 | -.416 | .000 |
| Severity3 | -.697 | -.254 | .667 | 1.025 | .552 | 1.813 | .626 | 3.229 | .377 | -.004 | .971 | .187 | -1.877 | -1.504 | 3.025 | .000 |
| Severity4 | -2.649 | -.908 | -.235 | .419 | 1.284 | 1.434 | -.845 | -.592 | -.861 | 3.349 | .301 | .656 | .906 | 1.607 | -1.253 | -1.373 | .000 |
| BI\_FM3 | .371 | -.309 | -.647 | .729 | .171 | 1.106 | .381 | .728 | -.663 | .225 | -.447 | .186 | .647 | -.817 | .936 | 1.096 | -.811 | .000 |
| BI\_FM2 | -.373 | -.007 | -.217 | 1.021 | .542 | .638 | -.093 | .219 | -.840 | .717 | -.399 | .222 | .815 | -.775 | 1.423 | 1.514 | -.644 | -.088 | .000 |
| BI\_FM1 | -.004 | -.294 | .005 | 1.912 | 1.141 | 1.144 | -.106 | .133 | -.952 | .835 | -.367 | .531 | .826 | -.466 | .950 | 1.146 | -.284 | -.104 | .121 | .000 |
| IN\_FM1 | .060 | .727 | .150 | 1.081 | 2.164 | .996 | -.133 | 1.009 | -.161 | -.719 | -2.357 | -.742 | .284 | -1.582 | 2.134 | .420 | -1.335 | .977 | .872 | .725 | .000 |
| SE\_FM4 | .439 | .260 | -.337 | 1.318 | 1.173 | .372 | -.063 | -.276 | -.377 | -1.004 | -1.573 | -1.525 | -1.431 | -2.249 | .515 | .783 | -2.352 | .927 | .409 | -.035 | .529 | .000 |
| SE\_FM3 | 1.517 | -.496 | -1.035 | -.208 | -.366 | -.549 | -.448 | .079 | -.417 | 1.362 | 1.549 | 1.584 | 1.412 | -.039 | 1.675 | 1.512 | .356 | .123 | -.327 | -.376 | -.116 | .005 | .000 |
| SE\_FM2 | .072 | .136 | .469 | 1.360 | 1.360 | .762 | .779 | -.743 | -.252 | -.164 | -.299 | -.470 | -.030 | -1.696 | .983 | 2.052 | -1.955 | .801 | -.142 | .044 | .182 | .143 | -.437 | .000 |
| SE\_FM1 | -.279 | -.389 | -1.162 | .431 | 1.018 | .479 | -.333 | -.117 | -.602 | -.374 | -.698 | -.904 | -.563 | -.846 | 1.017 | 1.814 | -1.923 | .746 | -.449 | -.254 | .544 | .131 | -.033 | .375 | .000 |
| RE\_FM4 | .743 | 1.500 | 1.126 | 2.865 | 1.879 | .769 | .809 | 2.796 | -.024 | 1.287 | -.011 | 1.064 | 1.228 | .310 | 3.083 | 2.829 | .682 | 1.055 | .781 | .798 | 2.492 | -.308 | 1.196 | .385 | .529 | .000 |
| RE\_FM3 | .229 | -.997 | -1.303 | .596 | .617 | .560 | -.336 | 1.901 | -1.067 | -.642 | -1.032 | -.256 | -.375 | -.727 | 2.498 | 1.312 | -.388 | .209 | -.550 | -.451 | .949 | -.231 | .387 | -.026 | -.485 | -.498 | .000 |
| RE\_FM2 | -.367 | -.452 | -1.393 | 1.598 | .599 | 1.063 | .113 | 1.115 | -1.587 | 1.067 | .780 | 1.188 | 1.429 | -.459 | 2.274 | .433 | -.511 | -.198 | -.753 | -.848 | .506 | -1.090 | -.788 | -.508 | -1.276 | -.438 | .498 | .000 |
| RE\_FM1 | -.575 | -.692 | -1.488 | .562 | -.706 | -.264 | -.625 | .881 | -1.383 | 2.124 | 2.396 | 1.909 | 2.043 | .077 | 3.050 | 1.069 | .818 | -1.086 | -1.163 | -1.194 | -.276 | -1.550 | 4.588 | -1.017 | -1.834 | -.334 | .342 | 1.176 | .000 |
| DN\_FM3 | .193 | 1.096 | .912 | 1.700 | 1.208 | -.313 | .254 | 1.095 | -.380 | -.096 | -1.258 | -.403 | -.622 | -.844 | .844 | .773 | -.918 | 1.284 | .839 | .765 | .176 | 1.034 | -.289 | .661 | .088 | 1.610 | .465 | -.057 | -1.136 | .000 |
| DN\_FM2 | -.457 | -1.020 | -.705 | -.720 | .117 | -1.460 | -.344 | .155 | .843 | .886 | -.590 | .056 | -.180 | -.199 | 1.151 | 1.296 | -.599 | -.379 | -.367 | -.497 | -.407 | .159 | .175 | .263 | .067 | .136 | -.340 | -.976 | -1.351 | -.412 | .000 |
| DN\_FM1 | -1.132 | -.942 | -.558 | -.425 | .027 | -.746 | -.119 | -.308 | .661 | .640 | -1.031 | .597 | .387 | .039 | .918 | .910 | -.077 | -.540 | -.493 | -.627 | -.648 | -.603 | -.591 | -.383 | -1.178 | .179 | .113 | -1.177 | -.880 | -.405 | 1.182 | .000 |

##### Notes for Group/Model (Group number 1 - Default model)

##### The following variances are negative. (Group number 1 - Default model)

|  | e40 |
| --- | --- |
|  | -1.181 |

##### The following covariance matrix is not positive definite (Group number 1 - Default model)

|  | BE\_FM | RI\_FM | INTENT\_FM | INJ\_FM | EFF\_CLEAN | DES\_FM |
| --- | --- | --- | --- | --- | --- | --- |
| BE\_FM | 1.223 |
| RI\_FM | .593 | 3.025 |
| INTENT\_FM | 1.136 | 1.161 | 2.231 |
| INJ\_FM | .842 | .891 | 1.480 | 1.340 |
| EFF\_CLEAN | .788 | 1.055 | 1.608 | 1.170 | 1.346 |
| DES\_FM | .952 | .838 | 1.416 | 1.441 | 1.153 | 1.535 |

This solution is not admissible.

##### Modification Indices (Group number 1 - Default model)

##### Covariances: (Group number 1 - Default model)

|  |  |  | M.I. | Par Change |
| --- | --- | --- | --- | --- |
| e15 | <--> | RI\_FM | 4.782 | -.102 |
| e14 | <--> | RI\_FM | 6.735 | .143 |
| e14 | <--> | e40 | 5.178 | .115 |
| e54 | <--> | RI\_FM | 6.414 | -.335 |
| e54 | <--> | e40 | 4.399 | -.254 |
| e53 | <--> | e41 | 4.040 | -.076 |
| e53 | <--> | e54 | 6.513 | .144 |
| e52 | <--> | EFF\_CLEAN | 5.638 | -.043 |
| e52 | <--> | e14 | 4.107 | -.048 |
| e52 | <--> | e54 | 4.130 | -.116 |
| e50 | <--> | INJ\_FM | 4.552 | .059 |
| e47 | <--> | RI\_FM | 4.790 | .230 |
| e47 | <--> | e54 | 11.596 | -.542 |
| e47 | <--> | e50 | 9.090 | .208 |
| e44 | <--> | e15 | 15.576 | -.132 |
| e44 | <--> | e14 | 38.269 | .246 |
| e43 | <--> | DES\_FM | 5.902 | .058 |
| e39 | <--> | RI\_FM | 12.969 | .317 |
| e39 | <--> | e40 | 14.895 | .309 |
| e38 | <--> | e50 | 4.576 | -.124 |
| e37 | <--> | e39 | 7.883 | -.229 |
| e36 | <--> | RI\_FM | 8.488 | -.235 |
| e36 | <--> | INJ\_FM | 4.544 | .083 |
| e36 | <--> | e40 | 9.495 | -.225 |
| e36 | <--> | e52 | 7.789 | -.097 |
| e35 | <--> | EFF\_CLEAN | 4.010 | -.089 |
| e35 | <--> | e43 | 4.502 | .126 |
| e35 | <--> | e39 | 4.078 | .186 |
| e34 | <--> | EFF\_CLEAN | 11.115 | .123 |
| e34 | <--> | e41 | 12.803 | -.274 |
| e34 | <--> | e14 | 12.509 | .171 |
| e34 | <--> | e53 | 4.311 | .067 |
| e34 | <--> | e52 | 7.995 | -.092 |
| e34 | <--> | e39 | 5.230 | -.175 |
| e33 | <--> | RI\_FM | 5.500 | -.170 |
| e33 | <--> | EFF\_CLEAN | 9.641 | .113 |
| e33 | <--> | e40 | 4.558 | -.142 |
| e33 | <--> | e15 | 13.270 | .148 |
| e33 | <--> | e44 | 7.240 | .144 |
| e33 | <--> | e38 | 7.548 | .207 |
| e33 | <--> | e36 | 8.420 | -.200 |
| e33 | <--> | e35 | 11.809 | -.265 |
| e33 | <--> | e34 | 33.267 | .373 |
| e32 | <--> | EFF\_CLEAN | 5.962 | -.106 |
| e32 | <--> | e41 | 10.759 | .295 |
| e32 | <--> | e15 | 11.835 | -.168 |
| e32 | <--> | e39 | 22.518 | .431 |
| e32 | <--> | e35 | 26.683 | .470 |
| e32 | <--> | e34 | 11.304 | -.259 |
| e32 | <--> | e33 | 12.332 | -.267 |
| e21 | <--> | INTENT\_FM | 7.666 | -.073 |
| e21 | <--> | EFF\_CLEAN | 18.274 | .098 |
| e21 | <--> | e15 | 16.871 | .106 |
| e19 | <--> | e53 | 16.165 | -.075 |
| e19 | <--> | e51 | 11.328 | .141 |
| e19 | <--> | e50 | 4.968 | .064 |
| e18 | <--> | DES\_FM | 4.514 | -.061 |
| e18 | <--> | e14 | 7.581 | .115 |
| e18 | <--> | e50 | 6.360 | .108 |
| e18 | <--> | e38 | 6.252 | -.165 |
| e18 | <--> | e36 | 6.340 | .152 |
| e18 | <--> | e35 | 5.352 | -.158 |
| e18 | <--> | e34 | 8.896 | .170 |
| e13 | <--> | RI\_FM | 7.384 | -.164 |
| e13 | <--> | INTENT\_FM | 4.855 | .075 |
| e13 | <--> | e14 | 9.130 | -.116 |
| e13 | <--> | e20 | 6.033 | .072 |
| e12 | <--> | e41 | 4.615 | .216 |
| e12 | <--> | e14 | 8.449 | .183 |
| e12 | <--> | e54 | 5.371 | .348 |
| e11 | <--> | e53 | 5.348 | -.059 |
| e11 | <--> | e52 | 8.409 | .075 |
| e11 | <--> | e45 | 9.724 | .105 |
| e11 | <--> | e44 | 9.731 | -.132 |
| e11 | <--> | e33 | 4.230 | .105 |
| e11 | <--> | e18 | 4.132 | -.091 |
| e10 | <--> | e14 | 6.345 | -.088 |
| e10 | <--> | e52 | 7.364 | -.064 |
| e10 | <--> | e21 | 7.221 | .081 |
| e10 | <--> | e20 | 4.274 | -.055 |
| e10 | <--> | e11 | 5.200 | .083 |
| e8 | <--> | BE\_FM | 7.979 | .112 |
| e8 | <--> | RI\_FM | 4.581 | .132 |
| e8 | <--> | EFF\_CLEAN | 7.757 | -.083 |
| e8 | <--> | e14 | 19.764 | -.166 |
| e8 | <--> | e44 | 11.011 | .147 |
| e8 | <--> | e33 | 4.475 | .112 |
| e8 | <--> | e18 | 10.596 | .151 |
| e8 | <--> | e13 | 6.560 | -.109 |
| e7 | <--> | BE\_FM | 5.752 | -.093 |
| e7 | <--> | e41 | 8.571 | -.179 |
| e7 | <--> | e45 | 4.167 | -.070 |
| e7 | <--> | e44 | 5.137 | .098 |
| e7 | <--> | e8 | 7.800 | -.114 |
| e6 | <--> | e41 | 4.091 | .164 |
| e6 | <--> | e14 | 7.208 | .131 |
| e6 | <--> | e52 | 6.224 | -.086 |
| e6 | <--> | e45 | 8.261 | .130 |
| e6 | <--> | e12 | 5.522 | -.213 |
| e6 | <--> | e7 | 6.076 | .132 |
| e5 | <--> | INTENT\_FM | 4.052 | -.114 |
| e5 | <--> | e41 | 6.389 | .254 |
| e5 | <--> | e14 | 7.821 | .173 |
| e5 | <--> | e38 | 5.623 | .238 |
| e5 | <--> | e13 | 4.318 | -.142 |
| e5 | <--> | e12 | 91.282 | 1.074 |
| e5 | <--> | e10 | 10.680 | -.204 |
| e5 | <--> | e6 | 10.917 | .297 |
| e4 | <--> | BE\_FM | 6.776 | .093 |
| e4 | <--> | INTENT\_FM | 4.410 | .067 |
| e4 | <--> | e43 | 6.391 | -.091 |
| e4 | <--> | e13 | 4.786 | .084 |
| e4 | <--> | e5 | 4.885 | -.140 |
| e3 | <--> | e47 | 10.279 | -.237 |
| e3 | <--> | e45 | 5.715 | -.081 |
| e3 | <--> | e43 | 10.388 | .128 |
| e3 | <--> | e4 | 4.469 | -.082 |
| e2 | <--> | RI\_FM | 4.042 | .120 |
| e2 | <--> | e15 | 6.734 | -.084 |
| e2 | <--> | e43 | 7.073 | .102 |
| e2 | <--> | e18 | 5.031 | -.099 |
| e2 | <--> | e7 | 9.163 | .125 |
| e2 | <--> | e4 | 4.880 | -.083 |
| e2 | <--> | e3 | 37.526 | .254 |

##### Variances: (Group number 1 - Default model)

|  |  |  | M.I. | Par Change |
| --- | --- | --- | --- | --- |

##### Regression Weights: (Group number 1 - Default model)

|  |  |  | M.I. | Par Change |
| --- | --- | --- | --- | --- |
| SEF\_FM | <--- | SUS | 4.702 | -.067 |
| RES\_FM | <--- | RI\_FM | 5.528 | .052 |
| SE\_FM6R | <--- | RI\_FM | 5.356 | -.121 |
| SE\_FM6R | <--- | SEV | 4.111 | -.173 |
| SE\_FM6R | <--- | IN\_FM4 | 10.425 | -.193 |
| SE\_FM6R | <--- | Severity4 | 5.025 | -.134 |
| BEHAVIOR\_FM\_1 | <--- | SUS | 6.549 | -.062 |
| BEHAVIOR\_FM\_1 | <--- | SE\_FM6R | 4.791 | .032 |
| BEHAVIOR\_FM\_1 | <--- | Susceptib1 | 8.752 | -.049 |
| BEHAVIOR\_FM\_1 | <--- | Susceptib3 | 6.390 | -.043 |
| BEHAVIOR\_FM\_1 | <--- | Severity3 | 5.150 | -.053 |
| BEHAVIOR\_FM\_1 | <--- | Severity4 | 5.302 | -.039 |
| BEHAVIOR\_FM\_2 | <--- | SE\_FM6R | 5.966 | -.036 |
| BEHAVIOR\_FM\_2 | <--- | Severity2 | 5.758 | -.054 |
| BEHAVIOR\_FM\_2 | <--- | SE\_FM1 | 6.410 | -.053 |
| BEHAVIOR\_FM\_2 | <--- | RE\_FM2 | 8.508 | -.051 |
| BEHAVIOR\_FM\_3 | <--- | EFF\_CLEAN | 4.076 | .121 |
| BEHAVIOR\_FM\_3 | <--- | RES\_FM | 5.885 | .132 |
| BEHAVIOR\_FM\_3 | <--- | BI\_FM1 | 7.632 | .117 |
| BEHAVIOR\_FM\_3 | <--- | RE\_FM4 | 6.626 | .121 |
| BEHAVIOR\_FM\_3 | <--- | RE\_FM2 | 8.293 | .112 |
| BEHAVIOR\_FM\_4 | <--- | RI\_FM | 4.859 | .050 |
| BEHAVIOR\_FM\_4 | <--- | EFF\_CLEAN | 4.089 | .083 |
| BEHAVIOR\_FM\_4 | <--- | SEV | 5.801 | .089 |
| BEHAVIOR\_FM\_4 | <--- | SEF\_FM | 4.027 | .076 |
| BEHAVIOR\_FM\_4 | <--- | IN\_FM4 | 11.931 | .089 |
| BEHAVIOR\_FM\_4 | <--- | Severity4 | 7.722 | .072 |
| BEHAVIOR\_FM\_4 | <--- | BI\_FM1 | 4.041 | .058 |
| BEHAVIOR\_FM\_4 | <--- | IN\_FM1 | 8.503 | .093 |
| BEHAVIOR\_FM\_4 | <--- | SE\_FM1 | 6.583 | .082 |
| BEHAVIOR\_FM\_4 | <--- | RE\_FM3 | 5.499 | .071 |
| IN\_FM4 | <--- | RI\_FM | 5.285 | .095 |
| IN\_FM4 | <--- | SEV | 5.069 | .152 |
| IN\_FM4 | <--- | SE\_FM6R | 8.628 | -.121 |
| IN\_FM4 | <--- | Severity1 | 6.101 | .120 |
| IN\_FM4 | <--- | Severity4 | 5.012 | .106 |
| SE\_FM5 | <--- | RES\_FM | 8.703 | .120 |
| SE\_FM5 | <--- | Severity3 | 9.278 | .119 |
| SE\_FM5 | <--- | RE\_FM4 | 16.150 | .141 |
| SE\_FM5 | <--- | RE\_FM3 | 11.602 | .113 |
| SE\_FM5 | <--- | RE\_FM2 | 8.462 | .085 |
| SE\_FM5 | <--- | RE\_FM1 | 6.046 | .066 |
| IN\_FM2 | <--- | RE\_FM3 | 4.281 | -.062 |
| IN\_FM2 | <--- | RE\_FM2 | 5.302 | -.061 |
| Susceptib1 | <--- | RI\_FM | 11.113 | .116 |
| Susceptib1 | <--- | SEV | 4.864 | .125 |
| Susceptib1 | <--- | Severity1 | 7.387 | .111 |
| Susceptib1 | <--- | Severity4 | 17.591 | .167 |
| Susceptib2 | <--- | BEHAVIOR\_FM\_3 | 4.428 | -.093 |
| Susceptib2 | <--- | BEHAVIOR\_FM\_4 | 5.678 | -.131 |
| Susceptib2 | <--- | IN\_FM1 | 6.742 | -.128 |
| Susceptib4 | <--- | RI\_FM | 6.121 | -.079 |
| Susceptib4 | <--- | Severity1 | 4.384 | -.078 |
| Susceptib4 | <--- | Severity3 | 9.058 | -.152 |
| Severity1 | <--- | Severity3 | 7.021 | -.152 |
| Severity1 | <--- | Severity4 | 8.851 | .123 |
| Severity1 | <--- | IN\_FM1 | 5.186 | -.116 |
| Severity1 | <--- | SE\_FM4 | 4.678 | -.106 |
| Severity1 | <--- | SE\_FM2 | 4.671 | -.103 |
| Severity2 | <--- | EFF\_CLEAN | 5.673 | .129 |
| Severity2 | <--- | SUS | 11.459 | -.168 |
| Severity2 | <--- | SEF\_FM | 5.738 | .121 |
| Severity2 | <--- | RES\_FM | 10.942 | .164 |
| Severity2 | <--- | SE\_FM5 | 6.227 | .115 |
| Severity2 | <--- | Susceptib1 | 13.817 | -.126 |
| Severity2 | <--- | Susceptib2 | 4.589 | -.081 |
| Severity2 | <--- | Susceptib3 | 6.285 | -.087 |
| Severity2 | <--- | Susceptib4 | 9.226 | -.111 |
| Severity2 | <--- | Severity3 | 19.572 | .211 |
| Severity2 | <--- | IN\_FM1 | 11.032 | .141 |
| Severity2 | <--- | SE\_FM4 | 4.059 | .082 |
| Severity2 | <--- | RE\_FM4 | 8.981 | .128 |
| Severity2 | <--- | RE\_FM3 | 11.493 | .136 |
| Severity2 | <--- | RE\_FM2 | 8.970 | .106 |
| Severity2 | <--- | RE\_FM1 | 10.337 | .104 |
| Severity3 | <--- | EFF\_CLEAN | 4.699 | .116 |
| Severity3 | <--- | SEF\_FM | 8.388 | .144 |
| Severity3 | <--- | SE\_FM5 | 14.457 | .173 |
| Severity3 | <--- | Severity1 | 4.633 | -.075 |
| Severity3 | <--- | Severity2 | 18.009 | .191 |
| Severity3 | <--- | SE\_FM4 | 5.003 | .089 |
| Severity3 | <--- | SE\_FM2 | 11.247 | .130 |
| Severity3 | <--- | SE\_FM1 | 8.641 | .123 |
| Severity3 | <--- | RE\_FM4 | 6.645 | .108 |
| Severity4 | <--- | SUS | 9.155 | .178 |
| Severity4 | <--- | SEF\_FM | 6.782 | -.156 |
| Severity4 | <--- | SE\_FM6R | 5.212 | -.081 |
| Severity4 | <--- | SE\_FM5 | 4.805 | -.120 |
| Severity4 | <--- | Susceptib1 | 23.163 | .193 |
| Severity4 | <--- | Susceptib4 | 7.256 | .117 |
| Severity4 | <--- | Severity1 | 10.970 | .139 |
| Severity4 | <--- | Severity2 | 6.279 | -.136 |
| Severity4 | <--- | Severity3 | 7.397 | -.154 |
| Severity4 | <--- | IN\_FM1 | 4.231 | -.103 |
| Severity4 | <--- | SE\_FM4 | 6.403 | -.122 |
| Severity4 | <--- | SE\_FM2 | 8.326 | -.135 |
| Severity4 | <--- | SE\_FM1 | 8.894 | -.150 |
| BI\_FM3 | <--- | SE\_FM4 | 4.706 | .055 |
| BI\_FM3 | <--- | SE\_FM2 | 4.912 | .055 |
| BI\_FM3 | <--- | SE\_FM1 | 7.948 | .075 |
| BI\_FM1 | <--- | BEHAVIOR\_FM\_3 | 7.764 | .061 |
| IN\_FM1 | <--- | BEHAVIOR\_FM\_4 | 6.054 | .100 |
| IN\_FM1 | <--- | Susceptib2 | 6.951 | -.086 |
| IN\_FM1 | <--- | RE\_FM4 | 10.316 | .118 |
| SE\_FM4 | <--- | RI\_FM | 6.915 | -.063 |
| SE\_FM4 | <--- | SUS | 9.030 | -.118 |
| SE\_FM4 | <--- | SEV | 6.992 | -.103 |
| SE\_FM4 | <--- | Susceptib1 | 4.216 | -.055 |
| SE\_FM4 | <--- | Susceptib2 | 5.555 | -.071 |
| SE\_FM4 | <--- | Susceptib3 | 6.557 | -.071 |
| SE\_FM4 | <--- | Susceptib4 | 6.520 | -.074 |
| SE\_FM4 | <--- | Severity1 | 6.972 | -.074 |
| SE\_FM4 | <--- | Severity4 | 5.341 | -.063 |
| SE\_FM4 | <--- | RE\_FM4 | 5.049 | -.076 |
| SE\_FM4 | <--- | RE\_FM1 | 5.019 | -.058 |
| SE\_FM3 | <--- | SUS | 7.595 | .178 |
| SE\_FM3 | <--- | SE\_FM6R | 4.602 | .084 |
| SE\_FM3 | <--- | Susceptib2 | 6.830 | .129 |
| SE\_FM3 | <--- | Susceptib3 | 6.309 | .113 |
| SE\_FM3 | <--- | Susceptib4 | 4.734 | .104 |
| SE\_FM3 | <--- | Severity4 | 4.177 | .092 |
| SE\_FM3 | <--- | RE\_FM1 | 55.298 | .314 |
| SE\_FM1 | <--- | BEHAVIOR\_FM\_2 | 4.113 | -.078 |
| SE\_FM1 | <--- | RE\_FM1 | 9.908 | -.074 |
| RE\_FM4 | <--- | BE\_FM | 13.103 | .166 |
| RE\_FM4 | <--- | RI\_FM | 6.255 | .061 |
| RE\_FM4 | <--- | INTENT\_FM | 5.482 | .079 |
| RE\_FM4 | <--- | DES\_FM | 4.595 | .088 |
| RE\_FM4 | <--- | SEV | 6.300 | .100 |
| RE\_FM4 | <--- | BEHAVIOR\_FM\_1 | 12.480 | .148 |
| RE\_FM4 | <--- | BEHAVIOR\_FM\_2 | 12.705 | .155 |
| RE\_FM4 | <--- | BEHAVIOR\_FM\_3 | 10.924 | .103 |
| RE\_FM4 | <--- | BEHAVIOR\_FM\_4 | 5.195 | .088 |
| RE\_FM4 | <--- | SE\_FM5 | 11.279 | .126 |
| RE\_FM4 | <--- | Severity3 | 8.926 | .116 |
| RE\_FM4 | <--- | BI\_FM2 | 5.481 | .075 |
| RE\_FM4 | <--- | BI\_FM1 | 5.564 | .074 |
| RE\_FM4 | <--- | IN\_FM1 | 12.636 | .122 |
| RE\_FM4 | <--- | SE\_FM1 | 4.493 | .073 |
| RE\_FM4 | <--- | DN\_FM3 | 6.544 | .088 |
| RE\_FM3 | <--- | SUS | 7.018 | -.104 |
| RE\_FM3 | <--- | BEHAVIOR\_FM\_1 | 4.949 | -.091 |
| RE\_FM3 | <--- | Susceptib1 | 8.483 | -.078 |
| RE\_FM3 | <--- | Susceptib2 | 5.318 | -.069 |
| RE\_FM3 | <--- | Susceptib4 | 5.213 | -.066 |
| RE\_FM2 | <--- | SE\_FM3 | 6.641 | -.089 |
| RE\_FM2 | <--- | RE\_FM1 | 5.439 | .079 |
| RE\_FM1 | <--- | SUS | 9.002 | .194 |
| RE\_FM1 | <--- | BEHAVIOR\_FM\_4 | 4.176 | -.126 |
| RE\_FM1 | <--- | Susceptib1 | 5.851 | .107 |
| RE\_FM1 | <--- | Susceptib2 | 12.407 | .174 |
| RE\_FM1 | <--- | Susceptib3 | 4.890 | .100 |
| RE\_FM1 | <--- | Susceptib4 | 5.259 | .109 |
| RE\_FM1 | <--- | BI\_FM3 | 4.122 | -.106 |
| RE\_FM1 | <--- | SE\_FM3 | 38.927 | .267 |
| RE\_FM1 | <--- | SE\_FM1 | 5.674 | -.132 |
| RE\_FM1 | <--- | DN\_FM3 | 5.576 | -.130 |
| DN\_FM3 | <--- | BE\_FM | 7.504 | .114 |
| DN\_FM3 | <--- | INTENT\_FM | 5.082 | .069 |
| DN\_FM3 | <--- | BEHAVIOR\_FM\_1 | 8.514 | .110 |
| DN\_FM3 | <--- | BEHAVIOR\_FM\_2 | 6.644 | .101 |
| DN\_FM3 | <--- | BEHAVIOR\_FM\_3 | 9.316 | .086 |
| DN\_FM3 | <--- | BI\_FM3 | 7.048 | .078 |
| DN\_FM3 | <--- | BI\_FM2 | 4.689 | .063 |
| DN\_FM3 | <--- | BI\_FM1 | 4.463 | .059 |
| DN\_FM3 | <--- | SE\_FM4 | 5.242 | .068 |
| DN\_FM2 | <--- | BEHAVIOR\_FM\_1 | 4.282 | -.086 |
| DN\_FM2 | <--- | BEHAVIOR\_FM\_3 | 5.285 | -.071 |
| DN\_FM2 | <--- | IN\_FM4 | 7.416 | -.076 |
| DN\_FM2 | <--- | DN\_FM1 | 8.560 | .093 |
| DN\_FM1 | <--- | BEHAVIOR\_FM\_1 | 4.028 | -.081 |
| DN\_FM1 | <--- | SE\_FM1 | 4.825 | -.073 |
| DN\_FM1 | <--- | DN\_FM2 | 9.589 | .095 |

##### Minimization History (Default model)

| Iteration |  | Negative eigenvalues | Condition # | Smallest eigenvalue | Diameter | F | NTries | Ratio |
| --- | --- | --- | --- | --- | --- | --- | --- | --- |
| 0 | e | 28 |  | -.808 | 9999.000 | 8710.430 | 0 | 9999.000 |
| 1 | e\* | 30 |  | -1.055 | 5.081 | 4535.331 | 20 | .345 |
| 2 | e | 21 |  | -.956 | .588 | 3595.709 | 7 | 1.005 |
| 3 | e\* | 13 |  | -1.140 | .567 | 2983.134 | 5 | .727 |
| 4 | e | 5 |  | -.420 | .863 | 2154.317 | 6 | .767 |
| 5 | e | 3 |  | -.203 | .414 | 1716.404 | 5 | 1.017 |
| 6 | e | 1 |  | -.010 | .788 | 1344.562 | 6 | .934 |
| 7 | e | 0 | 2621.232 |  | .421 | 1224.529 | 4 | .892 |
| 8 | e | 0 | 2435.195 |  | .428 | 1178.459 | 4 | .000 |
| 9 | e | 0 | 3260.173 |  | .750 | 1142.192 | 1 | .811 |
| 10 | e | 0 | 3363.943 |  | .206 | 1130.313 | 1 | 1.130 |
| 11 | e | 0 | 3401.255 |  | .098 | 1129.346 | 1 | 1.079 |
| 12 | e | 0 | 3483.736 |  | .011 | 1129.327 | 1 | 1.016 |
| 13 | e | 0 | 3458.382 |  | .000 | 1129.327 | 1 | 1.000 |

##### Model Fit Summary

##### CMIN

| Model | NPAR | CMIN | DF | P | CMIN/DF |
| --- | --- | --- | --- | --- | --- |
| Default model | 83 | 1129.327 | 445 | .000 | 2.538 |
| Saturated model | 528 | .000 | 0 |
| Independence model | 32 | 8634.451 | 496 | .000 | 17.408 |

##### RMR, GFI

| Model | RMR | GFI | AGFI | PGFI |
| --- | --- | --- | --- | --- |
| Default model | .148 | .821 | .788 | .692 |
| Saturated model | .000 | 1.000 |  |  |
| Independence model | .979 | .144 | .089 | .136 |

##### Baseline Comparisons

| Model | NFI Delta1 | RFI rho1 | IFI Delta2 | TLI rho2 | CFI |
| --- | --- | --- | --- | --- | --- |
| Default model | .869 | .854 | .916 | .906 | .916 |
| Saturated model | 1.000 |  | 1.000 |  | 1.000 |
| Independence model | .000 | .000 | .000 | .000 | .000 |

##### Parsimony-Adjusted Measures

| Model | PRATIO | PNFI | PCFI |
| --- | --- | --- | --- |
| Default model | .897 | .780 | .822 |
| Saturated model | .000 | .000 | .000 |
| Independence model | 1.000 | .000 | .000 |

##### NCP

| Model | NCP | LO 90 | HI 90 |
| --- | --- | --- | --- |
| Default model | 684.327 | 589.059 | 787.258 |
| Saturated model | .000 | .000 | .000 |
| Independence model | 8138.451 | 7840.400 | 8442.908 |

##### FMIN

| Model | FMIN | F0 | LO 90 | HI 90 |
| --- | --- | --- | --- | --- |
| Default model | 3.507 | 2.125 | 1.829 | 2.445 |
| Saturated model | .000 | .000 | .000 | .000 |
| Independence model | 26.815 | 25.275 | 24.349 | 26.220 |

##### RMSEA

| Model | RMSEA | LO 90 | HI 90 | PCLOSE |
| --- | --- | --- | --- | --- |
| Default model | .069 | .064 | .074 | .000 |
| Independence model | .226 | .222 | .230 | .000 |

##### AIC

| Model | AIC | BCC | BIC | CAIC |
| --- | --- | --- | --- | --- |
| Default model | 1295.327 | 1314.282 | 1608.872 | 1691.872 |
| Saturated model | 1056.000 | 1176.581 | 3050.600 | 3578.600 |
| Independence model | 8698.451 | 8705.759 | 8819.336 | 8851.336 |

##### ECVI

| Model | ECVI | LO 90 | HI 90 | MECVI |
| --- | --- | --- | --- | --- |
| Default model | 4.023 | 3.727 | 4.342 | 4.082 |
| Saturated model | 3.280 | 3.280 | 3.280 | 3.654 |
| Independence model | 27.014 | 26.088 | 27.959 | 27.037 |

##### HOELTER

| Model | HOELTER .05 | HOELTER .01 |
| --- | --- | --- |
| Default model | 142 | 148 |
| Independence model | 21 | 22 |

##### Execution time summary

|  |  |
| --- | --- |
| Minimization: | .036 |
| Miscellaneous: | 1.530 |
| Bootstrap: | .000 |
| Total: | 1.566 |
